# Supplementary material for: Urocortin Neuropeptide Levels Are Impaired in the PBMCs of Overweight Children
Source: MDPI journal article supplement (doi:10.3390/nu14030429), 2022-01-18
Supplement: s1 [file s1]

**Table S1.** List of human primers.

| Primers       | Catalog number or sequence                                                   |
|---------------|------------------------------------------------------------------------------|
| UCN1          | Hs01849155_s1 (Applied Biosystem, Foster City, CA, USA)                      |
| UCN2          | Hs00264218_s1 (Applied Biosystem, Foster City, CA, USA)                      |
| UCN3          | Hs00846499_s1 (Applied Biosystem, Foster City, CA, USA)                      |
| CRH           | Hs01921237_s1 (Applied Biosystem, Foster City, CA, USA)                      |
| Spexin        | Hs00228976_m1 (Applied Biosystem, Foster City, CA, USA)                      |
| TNF- $\alpha$ | Hs01113624_g1 (Applied Biosystem, Foster City, CA, USA)                      |
| IL-10         | Hs00961622_m1 (Applied Biosystem, Foster City, CA, USA)                      |
| IL-6          | Hs00985639_m1 (Applied Biosystem, Foster City, CA, USA)                      |
| CCL-2         | Hs00234140_m1 (Applied Biosystem, Foster City, CA, USA)                      |
| ATF-6         | 5'-ACCCACTAAAGGCCAGACG-3'<br>5'-CCACGTGATTAGGGAGCTGT-3'                      |
| PERK          | 5'-ATGATCATTCCCTTCCTGGAT-3'<br>5'-AGTCAGAGATTTTCTCCAACC-3'                   |
| IRE-1         | 5'-GCAAGAGGACAGGCTCAATC-3'<br>5'-ACGTCCTTTGAGCAGAATGC-3'                     |
| PKR           | 5'-TCGCTGGTATCACTCGTCTG-3'<br>5'-GATTCTGAAGACCGCCAGAG-3'                     |
| CHOP          | 5'-TGA GGA GAG AGT TAG GTA ATT CC-3'<br>5'-TTT AAA ACA GGT CAT TCC TCT GC-3' |

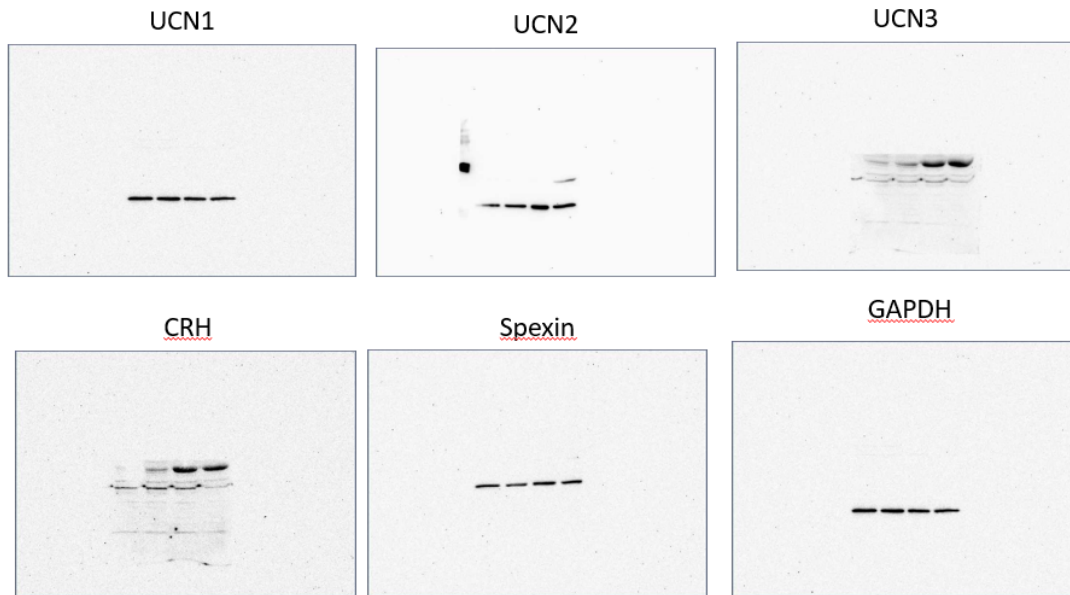

**Supplementary Figure S1.** Protein expression levels in THP1 cells treated for 24h (original Western blots).
